# Supplementary material
Source: publisher figshare collection journal article supplement (https://acs.figshare.com/ndownloader/files/4697902)
Supplement: Supplementary file 1 [file 4697902]

# In-situ Infrared Study of the Adsorption and Surface Acid-Base Properties of the Anions of Dicarboxylic Acids at Gold Single Crystal and Thin-Film Electrodes.

*José Manuel Delgado, Antonio Berná, José Manuel Orts, Antonio Rodes\* and Juan Miguel Feliu*

## Supporting information

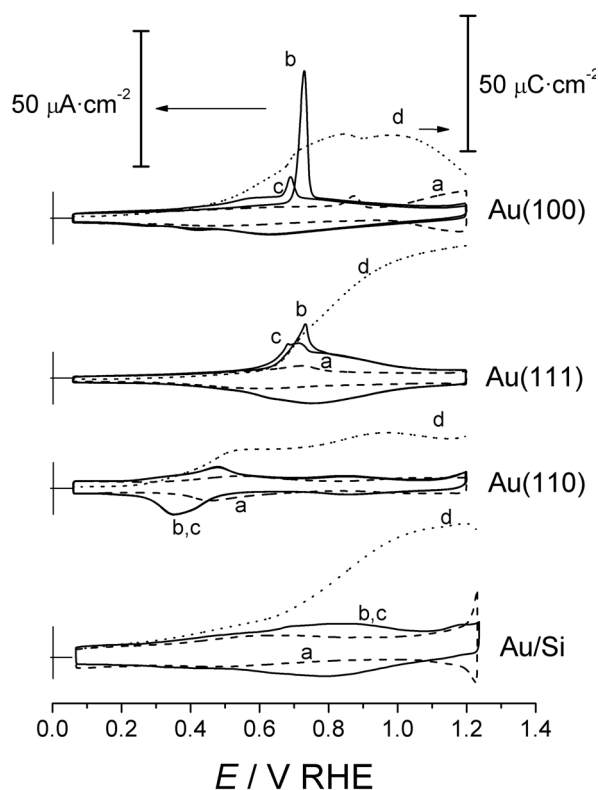

Cyclic voltammograms for Au(100), Au(111), Au(110) and an electrochemically annealed thin-film gold electrode in 0.1 M HClO<sub>4</sub> (a, dashed line) and 0.01 M H<sub>4</sub>C<sub>3</sub>O<sub>4</sub> + 0.1 M HClO<sub>4</sub> (b and c, solid lines, correspond to the first and second voltammetric cycle, respectively). Sweep rate: 50 mV s<sup>-1</sup>. Dotted curves (d) correspond to the charge density vs potential curves calculated by integrating the difference between voltammetric curves c and a.

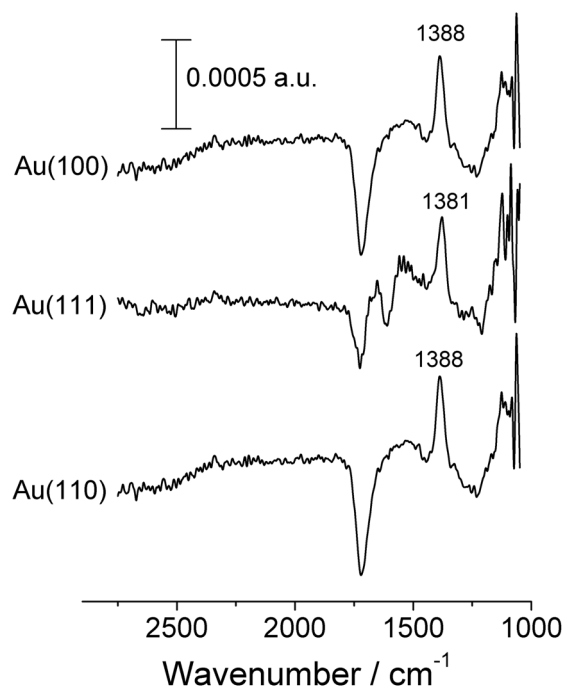

Potential-difference spectra collected at 1.20 V for a Au(100), Au(111) and Au(110) electrodes in 0.01 M H<sub>4</sub>C<sub>3</sub>O<sub>4</sub> + 0.1 M HClO<sub>4</sub> solutions. Reference potential: 0.10 V; 1000 interferograms collected at each potential.

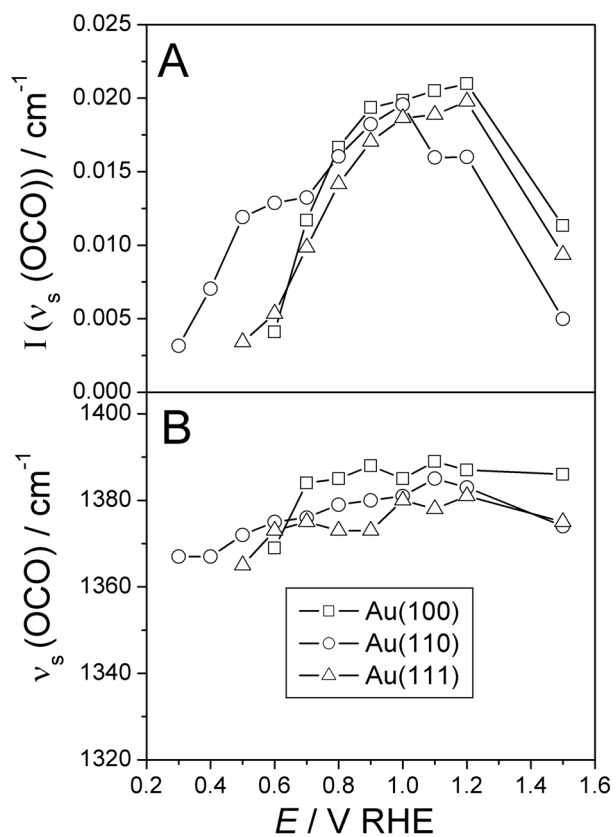

Plots of (A) the integrated intensity and (B) the adsorbate band frequencies of the adsorbate bands as measured in the potential-difference spectra collected for Au(100), Au(111) and Au(110) electrodes in contact with 0.01 M  $\text{H}_4\text{C}_3\text{O}_4$  + 0.1 M  $\text{HClO}_4$  solutions.

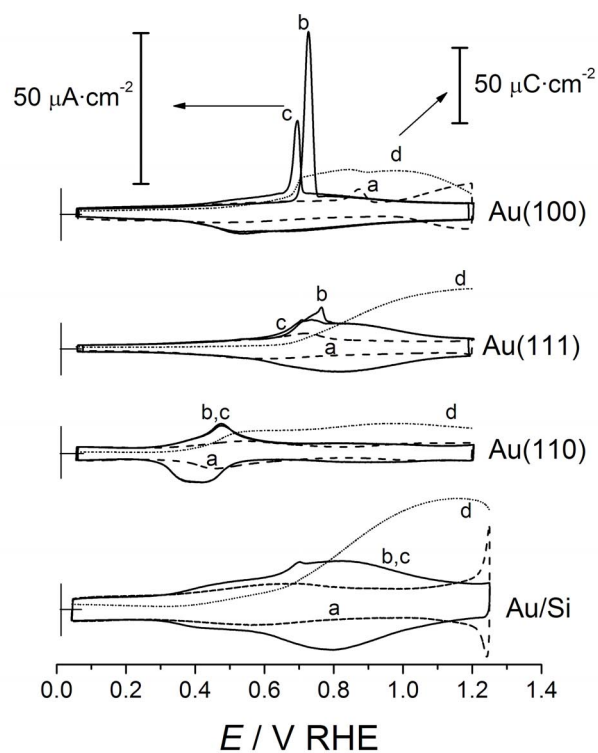

Cyclic voltammograms for Au(100), Au(111), Au(110) and an electrochemically annealed thin-film gold electrode in 0.1 M HClO<sub>4</sub> (a, dashed line) and 0.01 M H<sub>6</sub>C<sub>4</sub>O<sub>4</sub> + 0.1 M HClO<sub>4</sub> (b and c, solid lines, correspond to the first and second voltammetric cycle, respectively). Sweep rate: 50 mV s<sup>-1</sup>. Dotted curves (d) correspond to the charge density vs potential curves calculated by integrating the difference between voltammetric curves c and a.

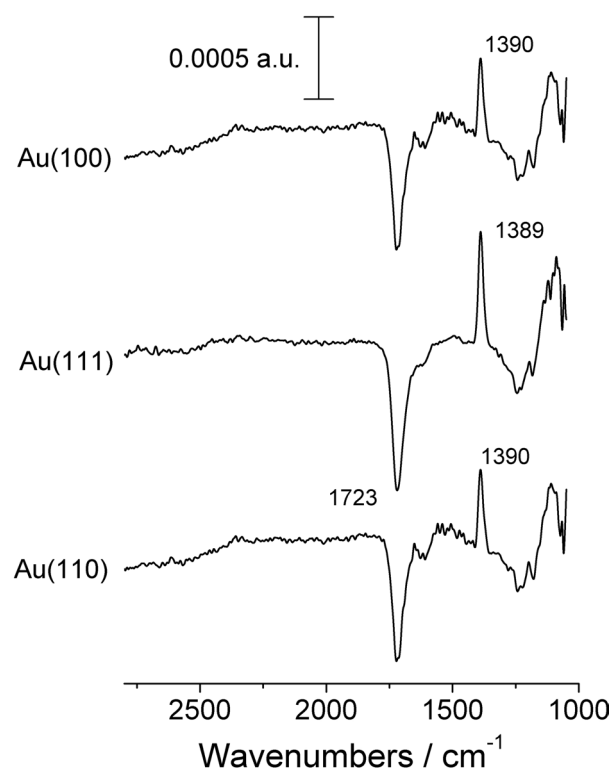

Potential-difference spectra collected at 1.20 V for a Au(100), Au(111) and Au(110) electrodes in 0.01 M H<sub>6</sub>C<sub>4</sub>O<sub>4</sub> + 0.1 M HClO<sub>4</sub> solutions. Reference potential: 0.10 V; 1000 interferograms collected at each potential.
